# Supplementary material for: Rationale and recommendations for improving definitions, registration requirements and procedures related to fetal death and stillbirth
Source: PubMed Central journal article supplement — BJOG. 2016 Sep 7;124(8):1153–7. doi: 10.1111/1471-0528.14242 (PMC5484358; doi:10.1111/1471-0528.14242), 2016-09-07
Supplement: BJO-124-1153-s001.pdf [file BJO-124-1153-s001.pdf]

**Table S1.** Centiles of birth weight for gestational age at 20 to 22 weeks gestation according to different fetal growth references.

| Country<br>(Reference)                                 | Sex      | Gestational<br>age | Birth weight                    |                                 |                                 |
|--------------------------------------------------------|----------|--------------------|---------------------------------|---------------------------------|---------------------------------|
|                                                        |          |                    | 10 <sup>th</sup> centile<br>(g) | 50 <sup>th</sup> centile<br>(g) | 90 <sup>th</sup> centile<br>(g) |
| Australia<br>(Dobbins et al. 2012). <sup>6</sup>       | Males    | 20 weeks           | 273                             | 340                             | 430                             |
|                                                        | Males    | 21 weeks           | 335                             | 420                             | 500                             |
|                                                        | Males    | 22 weeks           | 410                             | 500                             | 600                             |
|                                                        | Males    | 23 weeks           | 500                             | 588                             | 700                             |
|                                                        | Males    | 24 weeks           | 550                             | 684                             | 810                             |
|                                                        | Females  | 20 weeks           | 265                             | 320                             | 410                             |
|                                                        | Females  | 21 weeks           | 300                             | 390                             | 470                             |
|                                                        | Females  | 22 weeks           | 400                             | 480                             | 560                             |
|                                                        | Females  | 23 weeks           | 445                             | 560                             | 660                             |
|                                                        | Females  | 24 weeks           | 520                             | 641                             | 754                             |
| Canada<br>(Kramer et al. 2000). <sup>5</sup>           | Males    | 22 weeks           | 401                             | 490                             | 587                             |
|                                                        | Males    | 23 weeks           | 475                             | 589                             | 714                             |
|                                                        | Males    | 24 weeks           | 547                             | 690                             | 844                             |
|                                                        | Females  | 22 weeks           | 385                             | 466                             | 552                             |
|                                                        | Females  | 23 weeks           | 450                             | 557                             | 669                             |
| California<br>(Williams et al. 1982). <sup>3</sup>     | Females  | 24 weeks           | 513                             | 651                             | 790                             |
|                                                        | Males    | 22 weeks           | 326                             | 530                             | 736                             |
|                                                        | Males    | 23 weeks           | 376                             | 609                             | 852                             |
|                                                        | Males    | 24 weeks           | 433                             | 699                             | 982                             |
|                                                        | Females  | 22 weeks           | 314                             | 496                             | 755                             |
| United States<br>(Alexander et al. 1996). <sup>4</sup> | Females  | 23 weeks           | 354                             | 569                             | 869                             |
|                                                        | Females  | 24 weeks           | 400                             | 651                             | 996                             |
|                                                        | Combined | 20 weeks           | 275                             | 412                             | 772                             |
|                                                        | Combined | 21 weeks           | 314                             | 433                             | 790                             |
|                                                        | Combined | 22 weeks           | 376                             | 496                             | 826                             |
|                                                        | Combined | 23 weeks           | 440                             | 582                             | 882                             |
|                                                        | Combined | 24 weeks           | 498                             | 674                             | 977                             |
